# Supplementary material for: Novel Biomarker of Oxidative Stress Is Associated With Risk of Death in Patients With Coronary Artery Disease
Source: PubMed Central journal article supplement — Circulation. 2016 Jan 25;133(4):361–9. doi: 10.1161/CIRCULATIONAHA.115.019790 (PMC4722941; doi:10.1161/circulationaha.115.019790), 2016-01-25
Supplement: cir-133-361-s001.pdf [file cir-133-361-s001.pdf]

## Supplemental Material

## Supplemental Material

Title: A Novel Biomarker of Oxidative Stress is Associated with risk of Death in Patients with Coronary Artery Disease

Riyaz S. Patel MD,<sup>1,2</sup> Nima Ghasemzadeh MD,<sup>1</sup> Danny J Eapen MD,<sup>1</sup> Salman Sher MD,<sup>1</sup> Shawn Arshad MD,<sup>1</sup> Yi-an Ko PhD,<sup>3</sup> Emir Veledar PhD,<sup>4,5</sup> Habib Samady MD,<sup>1</sup> A. Maziar Zafari MD, PhD,<sup>1,6</sup> Laurence Sperling MD,<sup>1</sup> Viola Vaccarino MD, PhD,<sup>1,5</sup> Dean P Jones, PhD,<sup>1</sup> Arshed A. Quyyumi MD<sup>1\*</sup>

<sup>1</sup>Dept of Medicine, Emory University School of Medicine, Atlanta, GA, USA

<sup>2</sup>Institute of Cardiovascular Science, University College London, London, UK

<sup>3</sup>Department of Biostatistics and Bioinformatics, Rollins School of Public Health, Atlanta, GA, USA

<sup>4</sup>Dept of Medicine, Baptist Health South Florida, FI, USA

<sup>5</sup>Dept of Epidemiology, Rollins School of Public Health, Atlanta, GA, USA

<sup>6</sup>Dept of Medicine, Atlanta Veterans Affairs Medical Center, Decatur, GA, USA

## Contents

|                                    |    |
|------------------------------------|----|
| Supplementary Methods.....         | 3  |
| Supplementary Table 1.....         | 4  |
| Supplementary Table 2A.....        | 5  |
| Supplementary Table 2B:.....       | 6  |
| Supplementary Table 3:.....        | 7  |
| Supplementary Table 4:.....        | 8  |
| Supplementary Figure 1: .....      | 9  |
| Supplementary Figure 2 .....       | 10 |
| Supplementary Figure Legends ..... | 11 |

## **Supplementary Methods:** Sample collection and storage details.

A full methods paper has been published previously which details each step of the protocol with key references and figures to replicate the procedure exactly (Jones 2009). Abbreviated key details for review are provided here:

Collection of samples and processing involves use of 2 sets of microcentrifuge (Eppendorf) tubes termed “N” and “S” tubes, prepared in advance and stored at -80C. The “N” tube consists of L serine, heparin, bathophenanthroline disulfonate, iodoacetic acid in borate buffer with internal standard. Treatment with the first derivatizing agent (to block thiols) occurs during the sample collection and is complete by the time the plasma (from N tube) is transferred to S tube. The “S” tube contains boric acid in distilled de-ionized water.

Blood is drawn with a syringe through the arterial sheath at the time of catheterization as in this study or via butterfly needle if venous cannulation is performed. Blood is transferred to the “N” tube carefully bringing the level up to the 1.5ml line (to account for 1350ul of blood and 150ul of additive). The tube is inverted gently and then spun using a centrifuge to remove RBCs. Routine use of this method has only identified minor haemolysis in 2 of 600 samples by spectrophotometry. Next, 200ul of supernatant is transferred to the “S” tube. This should be done within 2 minutes after blood collection, although 5 minutes is acceptable. This tube is then inverted gently, labelled and placed on ice before transfer to a -80C freezer.

Within 1-2 months, samples are shipped to an onsite laboratory for analysis. Samples in the “S” tubes are thawed and the supernatant transferred to a fresh Eppendorf tube before addition of KOH to adjust the pH to 9.0, followed by addition of dansyl chloride. Chloroform is added to extract unreacted dansyl chloride and samples stored again until assay by HPLC, usually within a few days.

Reproducibility, stability and recovery tests for glutathione have indicated that non-derivatized samples stored at -80C were stable for 2 months without significant loss, while dansyl-derivatives were stable in the dark at 0-4 degrees for 12 months (Jones 1998). Similar findings have been documented for the cystine pool, with no evidence of loss demonstrated at 12 months (Johnson 2008).

**Supplementary Table 1:** Correlation coefficients between each of the thiols

|                               | <b>Cystine</b> | <b>Cysteine</b> | <b>Glutathione</b> | <b>Glutathione disulphide</b> | <b>C-Reactive Protein</b> |
|-------------------------------|----------------|-----------------|--------------------|-------------------------------|---------------------------|
| <b>Cystine</b>                |                | 0.262           | -0.111             | 0.075                         | 0.057                     |
| <b>Cysteine</b>               |                |                 | 0.330              | 0.095                         | -0.015                    |
| <b>Glutathione</b>            |                |                 |                    | 0.314                         | -0.025                    |
| <b>Glutathione disulphide</b> |                |                 |                    |                               | 0.038                     |
| <b>C-Reactive Protein</b>     |                |                 |                    |                               |                           |

Spearman Rank coefficients ( $\rho$ ) for correlation between markers

**Supplementary Table 2A:** Univariate and multivariate associations between patient characteristics and the cysteine couple

|                                   | Cystine     |                |              |                | Cysteine    |                |              |                |
|-----------------------------------|-------------|----------------|--------------|----------------|-------------|----------------|--------------|----------------|
|                                   | Univariate  |                | Multivariate |                | Univariate  |                | Multivariate |                |
|                                   | <i>beta</i> | <i>p value</i> | <i>beta</i>  | <i>p value</i> | <i>beta</i> | <i>p value</i> | <i>beta</i>  | <i>p value</i> |
| <b>Age, years</b>                 | 0.30        | <0.001         | 0.164        | <0.001         | 0.08        | 0.002          | 0.005        | 0.89           |
| <b>Male Gender</b>                | -0.12       | <0.001         | -0.095       | 0.001          | -0.04       | 0.11           | -0.056       | 0.053          |
| <b>Body Mass Index, kg/m2</b>     | 0.13        | <0.001         | 0.128        | <0.001         | -0.01       | 0.60           | -0.016       | 0.523          |
| <b>GFR, ml/min</b>                | -0.39       | <0.001         | -0.261       | <0.001         | -0.13       | <0.001         | -0.115       | <0.001         |
| <b>Acute MI</b>                   | 0.04        | 0.19           | 0.012        | 0.672          | 0.013       | 0.62           | -0.006       | 0.79           |
| <b>Diabetes</b>                   | 0.17        | <0.001         | 0.092        | <0.001         | 0.03        | 0.20           | 0.020        | 0.47           |
| <b>Hypertension</b>               | 0.18        | <0.001         | 0.058        | 0.021          | 0.04        | 0.14           | 0.007        | 0.82           |
| <b>Current Smoking</b>            | -0.11       | <0.001         | -0.046       | 0.085          | -0.026      | 0.33           | -0.012       | 0.612          |
| <b>LV EF, %</b>                   | -0.06       | 0.02           | -0.044       | 0.042          | -0.05       | 0.054          | -0.047       | 0.099          |
| <b>Gensini Score (CAD burden)</b> | 0.13        | <0.001         | 0.038        | 0.168          | 0.09        | 0.001          | 0.064        | 0.044          |
| <b>Statin use</b>                 | 0.07        | 0.006          | 0.008        | 0.753          | 0.06        | 0.022          | 0.035        | 0.169          |
| <b>HDL, mg/dl</b>                 | -0.03       | 0.33           | -0.037       | 0.31           | -0.02       | 0.52           | -0.036       | 0.197          |
| <b>Total Cholesterol, mg/dl</b>   | -0.08       | 0.003          | -0.003       | 0.80           | 0.034       | 0.20           | 0.072        | 0.013          |
| <b>hs-CRP, mg/L (log)</b>         | 0.06        | 0.03           | -0.001       | 0.951          | -0.01       | 0.69           | -0.039       | 0.195          |

Multivariate model - Independent determinants of each aminothiols (natural log transformed), using linear regression with all variables in the left column entered into the same model. GFR – Glomerular Filtration Rate; MI – Myocardial Infarction; CAD – Coronary Artery Disease; LVEF – Left Ventricular Ejection Fraction; HDL – High Density Lipoprotein; hs-CRP – high sensitivity C Reactive Protein

**Supplementary Table 2B:** Univariate and multivariate associations between patient characteristics and the glutathione couple

|                                   | Glutathione |                |              |                | Glutathione disulphide |                |              |                |
|-----------------------------------|-------------|----------------|--------------|----------------|------------------------|----------------|--------------|----------------|
|                                   | Univariate  |                | Multivariate |                | Univariate             |                | Multivariate |                |
|                                   | <i>beta</i> | <i>p value</i> | <i>beta</i>  | <i>p value</i> | <i>beta</i>            | <i>p value</i> | <i>beta</i>  | <i>p value</i> |
| <b>Age, years</b>                 | -0.10       | <0.01          | -0.072       | 0.042          | 0.04                   | 0.12           | 0.000        | 0.964          |
| <b>Male Gender</b>                | 0.04        | 0.14           | 0.029        | 0.323          | 0.004                  | 0.89           | 0.028        | 0.335          |
| <b>Body Mass Index, kg/m2</b>     | -0.05       | 0.058          | -0.067       | 0.020          | -0.024                 | 0.41           | -0.027       | 0.555          |
| <b>GFR, ml/min</b>                | 0.06        | 0.021          | 0.037        | 0.353          | -0.077                 | 0.004          | -0.074       | 0.020          |
| <b>Acute MI</b>                   | 0.08        | 0.76           | 0.007        | 0.810          | 0.044                  | 0.10           | 0.037        | 0.171          |
| <b>Diabetes</b>                   | -0.08       | 0.004          | -0.039       | 0.152          | -0.013                 | 0.63           | -0.006       | 0.782          |
| <b>Hypertension</b>               | -0.09       | 0.001          | -0.041       | 0.124          | 0.018                  | 0.51           | 0.014        | 0.617          |
| <b>Current Smoking</b>            | -0.012      | 0.66           | -0.041       | 0.122          | -0.014                 | 0.60           | -0.011       | 0.735          |
| <b>LV EF, %</b>                   | -0.015      | 0.57           | -0.029       | 0.292          | -0.021                 | 0.42           | -0.013       | 0.633          |
| <b>Gensini score (CAD burden)</b> | -0.06       | 0.016          | -0.067       | 0.026          | -0.023                 | 0.38           | -0.057       | 0.087          |
| <b>Statin use</b>                 | 0.014       | 0.6            | 0.055        | 0.052          | 0.014                  | 0.64           | 0.032        | 0.562          |
| <b>HDL, mg/dl</b>                 | -0.013      | 0.63           | -0.032       | 0.223          | 0.035                  | 0.19           | 0.039        | 0.168          |
| <b>Total Cholesterol</b>          | 0.07        | 0.008          | 0.061        | 0.020          | -0.012                 | 0.66           | -0.006       | 0.779          |
| <b>hs-CRP, mg/L (log)</b>         | -0.016      | 0.56           | -0.005       | 0.843          | 0.037                  | 0.17           | 0.035        | 0.242          |

Multivariate model - Independent determinants of each aminothiols (natural log transformed), using linear regression with all variables in the left column entered into the same model. GFR – Glomerular Filtration Rate; MI – Myocardial Infarction; CAD – Coronary Artery Disease; LVEF – Left Ventricular Ejection Fraction; HDL – High Density Lipoprotein; hs-CRP – high sensitivity C Reactive Protein

**Supplementary Table 3:** Univariate and multivariate predictors of death

|                                   | <b>Univariate (beta, p)</b> | <b>Multivariate Effect (HR, 95 CI)</b> | <b>P value</b> |
|-----------------------------------|-----------------------------|----------------------------------------|----------------|
| <b>Age, years</b>                 | 0.04 (0.008)                | 1.04 (1.025-1.058)                     | P<0.001        |
| <b>Male Gender</b>                | 0.16 (0.15)                 | 1.174 (0.87-1.59)                      | 0.302          |
| <b>Body Mass Index, kg/m2</b>     | -0.025 (0.012)              | 0.98 (0.95-1.00)                       | 0.049          |
| <b>GFR, ml/min</b>                | -0.014 (0.004)              | 0.986 (0.979-0.993)                    | <0.001         |
| <b>Acute MI</b>                   | 0.072 (0.170)               | 1.075 (0.77-1.501)                     | 0.67           |
| <b>Diabetes</b>                   | 0.47 (0.14)                 | 1.59 (1.21-2.09)                       | 0.001          |
| <b>Hypertension</b>               | 0.341 (0.163)               | 1.406 (1.02-1.94)                      | 0.037          |
| <b>Current Smoking</b>            | 0.280 (0.183)               | 1.32 (0.93-1.89)                       | 0.125          |
| <b>LV EF, %</b>                   | -0.027 (0.005)              | 0.97 (0.96-0.98)                       | <0.001         |
| <b>Gensini score (CAD burden)</b> | 0.044 (0.042)               | 1.05 (0.96-1.14)                       | 0.30           |
| <b>Statin use</b>                 | -0.290 (0.155)              | 0.75 (0.55-1.01)                       | 0.061          |
| <b>HDL, mg/dl</b>                 | 0.001 (0.006)               | 1.001 (0.989-1.014)                    | 0.84           |
| <b>Total Cholesterol</b>          | -0.001 (0.002)              | 0.99 (0.995-1.002)                     | 0.45           |
| <b>hs-CRP, mg/L (log)</b>         | 0.254 (0.052)               | 1.289 (1.16-1.428)                     | <0.001         |

Multivariate model - Independent determinants of death using cox regression with all variables in the left column entered into the same model. GFR – Glomerular Filtration Rate; MI –Myocardial Infarction; CAD – Coronary Artery Disease; LVEF –Left Ventricular Ejection Fraction; HDL – High Density Lipoprotein; hs-CRP – high sensitivity C Reactive Protein

**Supplementary Table 4:** Cox regression analysis of aminothiols association with death by quartiles

|                 |  | <b>Cystine</b>        |                      | <b>Glutathione</b>    |                      |
|-----------------|--|-----------------------|----------------------|-----------------------|----------------------|
|                 |  | Q4 v Q1               |                      | Q1 v Q4               |                      |
|                 |  | HR (95% CI)           |                      | HR (95% CI)           |                      |
| <b>Outcome</b>  |  | Age & gender adjusted | Fully adjusted model | Age & gender adjusted | Fully adjusted model |
| <i>Death</i>    |  | 2.15 (1.39-3.35)      | 1.82 (1.16-2.86)     | 1.64 (1.14-2.40)      | 1.40 (0.97-2.03)     |
| <i>Death/MI</i> |  | 1.98 (1.37-2.85)      | 1.72 (1.18-2.51)     | 1.47 (1.07-2.03)      | 1.29 (0.93-1.79)     |
| <i>CV Death</i> |  | 2.05 (1.25-3.39)      | 1.75 (1.05-2.91)     | 1.67 (1.11-2.53)      | 1.42 (0.93-2.16)     |

Cox regression analysis of aminothiol marker ratios as quartiles, with risk of adverse outcomes; Q1 = lowest quartile and Q4 = highest quartile; Full model includes adjustment for age, gender, body mass index, glomerular filtration rate, diabetes, hypertension, TC, HDL, current smoking, statin use, acute myocardial infarction, LV EF, Gensini score and LnCRP.



**Supplementary Figure 1:** Kaplan Meier analysis for cystine and glutathione by quartiles, for association with the primary outcome of Death

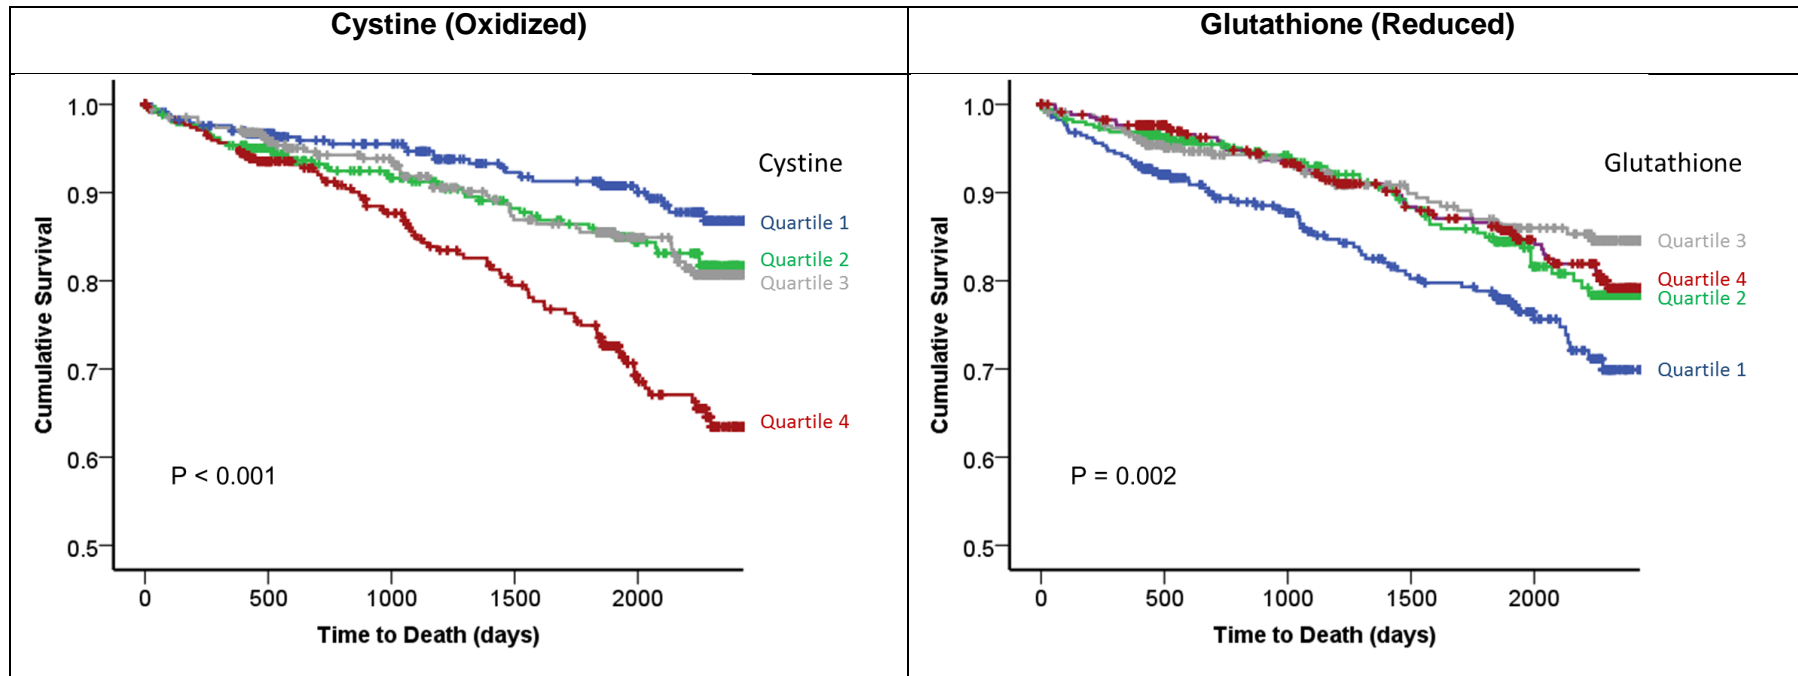

**Supplementary Figure 2: Interplay between homocysteine and cysteine and glutathione**

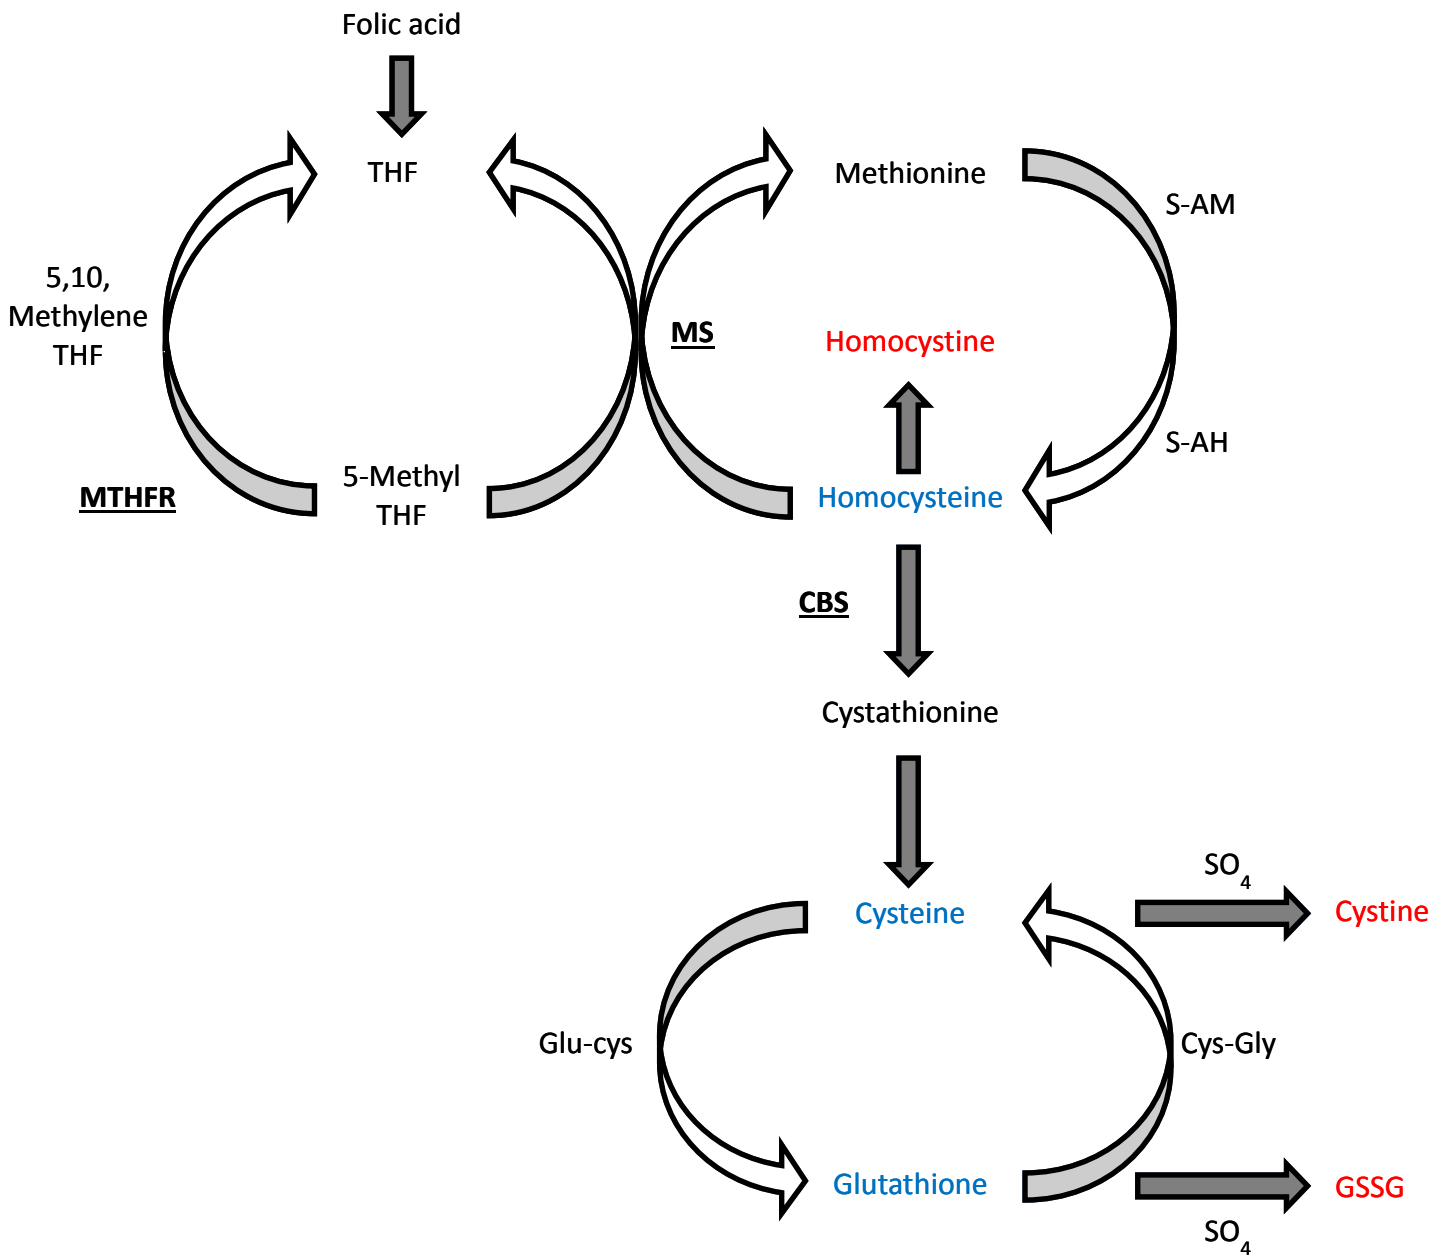

## **Supplementary Figure Legends:**

**Supplementary Figure 1:** Kaplan Meier curves for association with quartiles of cystine and glutathione; Log rank p values and number of patients within each category is shown.

**Supplementary Figure 2:** Homocysteine pathway - Homocysteine may be converted to cystathionine by cystathionine beta synthase. This in turn may yield cysteine. Cysteine and glutathione may be generated from each other. As these thiols are reduced (blue) they may become oxidized (red) to generate the oxidized thiols cysteine and glutathione disulphide. There is no known pathway to reduce these oxidized thiols back to their reduced state.

MTHFR – methyl tetrahydrofolate reductase; MS - Methionine synthase; CBS – cystathionine beta synthase; GSSG – glutathione disulphide; THF – tetrahydrofolate; S-AH – S-adenosyl homocysteine; SAM -adenosyl methionine
